# Supplementary material for: Pro- and Antioxidant Effect of Food Items and Matrices during Simulated In Vitro Digestion
Source: MDPI journal article supplement (doi:10.3390/foods12081719), 2023-04-20
Supplement: s1 [file s1]

**Supplementary Table S1:** Food combinations for each digesta\*.

| Condition(s) | Food item 1             | Food item 2                   | Quantity used per simulated digestion (Food item 1 + Food item 2) |
|--------------|-------------------------|-------------------------------|-------------------------------------------------------------------|
| 1            | Soda (Sprite)           | Tomato Juice (Delhaize®)      | 2 mL + 2 mL                                                       |
| 2            | Soda                    | Orange Juice (Minute Maid)    | 2 mL + 2 mL                                                       |
| 3            | Soda                    | Vitamin C (Sigma-Aldrich)     | 2 mL + 2.5 mg                                                     |
| 4            | Soda                    | Vitamin E (Fisher Scientific) | 2 mL + 1.5 mg                                                     |
| 5            | Soda                    | Coffee (Chaqwa®)**            | 2 mL + 2 mL                                                       |
| 6            | Soda                    | Curcumin (Apollo Scientific)  | 2 mL + 12.5 mg                                                    |
| 7            | Soda                    | -                             | 2 mL                                                              |
| 8            | Sausage (Aoste)         | Tomato Juice                  | 2 g + 2 mL                                                        |
| 9            | Sausage                 | Orange Juice                  | 2 g + 2 mL                                                        |
| 10           | Sausage                 | Vitamin C                     | 2 g + 2.5 mg                                                      |
| 11           | Sausage                 | Vitamin E                     | 2 g + 1.5 mg                                                      |
| 12           | Sausage                 | Coffee                        | 2 g + 2 mL                                                        |
| 13           | Sausage                 | Curcumin                      | 2 g + 12.5 mg                                                     |
| 14           | Sausage                 | -                             | 2 g                                                               |
| 15           | White Chocolate (Lindt) | Tomato Juice                  | 2 g + 2 mL                                                        |
| 16           | White Chocolate         | Orange Juice                  | 2 g + 2 mL                                                        |
| 17           | White Chocolate         | Vitamin C                     | 2 g + 2.5 mg                                                      |
| 18           | White Chocolate         | Vitamin E                     | 2 g + 1.5 mg                                                      |
| 19           | White Chocolate         | Coffee                        | 2 g + 2 mL                                                        |
| 20           | White Chocolate         | Curcumin                      | 2 g + 12.5 mg                                                     |
| 21           | White Chocolate         | -                             | 2 g                                                               |
| 22           | Tomato Juice            | -                             | 2 mL                                                              |
| 23           | Orange Juice            | -                             | 2 mL                                                              |
| 24           | Vitamin C               | -                             | 2.5 mg                                                            |
| 25           | Vitamin E               | -                             | 1.5 mg                                                            |
| 26           | Coffee                  | -                             | 2 mL                                                              |
| 27           | Curcumin                | -                             | 12.5 mg                                                           |
| 28           | Coffee                  | Vitamin C                     | 2 mL + 2.5 mg                                                     |
| 29           | Coffee                  | Orange Juice                  | 2 mL + 2 mL                                                       |
| 30           | Vitamin E               | Vitamin C                     | 1.5 mg + 2.5 mg                                                   |
| 31           | Sausage                 | White Chocolate               | 2 g + 2 g                                                         |
| 32           | Soda                    | White Chocolate               | 2 mL + 2 g                                                        |
| 33           | Sausage                 | Soda                          | 2 g + 2 mL                                                        |

\* More details on the composition of food items are given in the Materials and Methods section: 2.2. Food items and matrices (Table 1). All food items were purchased from a local supermarket (Delhaize®, Strassen, Luxembourg).

\*\* Coffee machine model: Stand-Alone Automatique, Anderlecht, Belgium.

**Supplementary Table S2:** Stock solutions used for preparing gastric (SGF) and intestinal fluids (SIF) for digestion.

| Solute                                            | Stock Solution |          | SGF (108 mL)  |            | SIF (216 mL)  |            |
|---------------------------------------------------|----------------|----------|---------------|------------|---------------|------------|
|                                                   | Concentration  |          | Concentration | Vol. Stock | Concentration | Vol. Stock |
|                                                   | mol/L          | g/100 mL | mmol/L        | mL         | mmol/L        | mL         |
| KCl                                               | 0.50           | 3.73     | 6.9           | 1.87       | 6.8           | 3.68       |
| KH <sub>2</sub> PO <sub>4</sub>                   | 0.50           | 6.80     | 0.9           | 0.24       | 0.8           | 0.43       |
| NaHCO <sub>3</sub>                                | 1.00           | 21.00    | 25            | 3.38       | 85            | 22.98      |
| NaCl                                              | 2.00           | 11.69    | 47.2          | 3.19       | 38.4          | 5.19       |
| MgCl <sub>2</sub> (H <sub>2</sub> O) <sub>6</sub> | 0.15           | 3.05     | 0.1           | 0.09       | 0.33          | 0.59       |
| (NH <sub>4</sub> ) <sub>2</sub> CO <sub>3</sub>   | 0.50           | 4.80     | 0.5           | 0.14       | 0             | 0          |
| CaCl <sub>2</sub> (H <sub>2</sub> O) <sub>2</sub> | 0.03           | 0.441    | 0.075         | 32.5       | 0.3           | 260        |

**Supplementary Table S3:** Standard preparation for FRAP assay.

| Standard   | Iron (II) chloride concentration (mg/L) | Dilution | Iron (II) chloride stock solution (μL) | Distilled water (μL) |
|------------|-----------------------------------------|----------|----------------------------------------|----------------------|
| Blank      | 0                                       | 0        | 0                                      | 1000                 |
| Standard 1 | 6.34                                    | 1:400    | 2.5                                    | 997.5                |
| Standard 2 | 12.68                                   | 1:200    | 5                                      | 995                  |
| Standard 3 | 19.02                                   | 1:333,33 | 7.5                                    | 992.5                |
| Standard 4 | 25.36                                   | 1:100    | 10                                     | 990                  |
| Standard 5 | 38.04                                   | 1:66,66  | 15                                     | 985                  |
| Standard 6 | 50.72                                   | 1:50     | 20                                     | 980                  |
| Standard 7 | 76.09                                   | 1:33,33  | 30                                     | 970                  |
| Standard 8 | 101.44                                  | 1:25     | 40                                     | 960                  |
| Standard 9 | 126.8                                   | 1:20     | 50                                     | 950                  |

**Supplementary Table S4:** Ascorbic acid standards employed for the ABTS assay.

| Standard   | Concentration (mg/mL) | Dilution | Ascorbic acid stock solution (µL) | Distilled water (µL) |
|------------|-----------------------|----------|-----------------------------------|----------------------|
| Blank      | 0                     | 0        | 0                                 | 1000                 |
| Standard 1 | 0.05                  | 1:200    | 5                                 | 995                  |
| Standard 2 | 0.1                   | 1:100    | 10                                | 990                  |
| Standard 3 | 0.2                   | 1:50     | 20                                | 980                  |
| Standard 4 | 0.3                   | 1:33,33  | 30                                | 970                  |
| Standard 5 | 0.4                   | 1:25     | 40                                | 960                  |
| Standard 6 | 0.5                   | 1:20     | 50                                | 950                  |

**Supplementary Table S5:** MDA (malondialdehyde) calibration curve dilutions.

| Sample | MDA 25 µM (µL) | Distilled<br>water (µL) | MDA concentration (µM) |
|--------|----------------|-------------------------|------------------------|
| A      | 0              | 500                     | 0                      |
| B      | 2.5            | 498                     | 0.125                  |
| C      | 5              | 495                     | 0.25                   |
| D      | 10             | 490                     | 0.5                    |
| E      | 20             | 480                     | 1                      |
| F      | 50             | 450                     | 2.5                    |
| G      | 100            | 400                     | 5                      |
| H      | 200            | 300                     | 10                     |
| I      | 400            | 100                     | 20                     |
